# Supplementary material for: Boosting steam tolerance and electrochemical performance of an La0.6Sr0.4Co0.2Fe0.8O3−δ-based air electrode for protonic ceramic electrochemical cells
Source: Royal Society of Chemistry journal article supplement (doi:10.1039/d4ta03706e), 2024-01-01
Supplement: d4ta03706e1.pdf [file d4ta03706e1.pdf]

## Electronic Supplementary Information

### **Boost Steam-Tolerance and Electrochemical Performance of $\text{La}_{0.6}\text{Sr}_{0.4}\text{Co}_{0.2}\text{Fe}_{0.8}\text{O}_{3-\delta}$ -based Air Electrode for Protonic Ceramic Electrochemical Cells**

Lei Wu<sup>a</sup>, Jiqiang Sun<sup>a</sup>, Huiying Qi<sup>b</sup>, Baofeng Tu<sup>b</sup>, Chunyan Xiong<sup>c</sup>, Fanglin Chen<sup>d,\*</sup>, and Peng Qiu<sup>a,\*</sup>

<sup>a</sup> School of Materials Science and Engineering, Shandong University of Science and Technology, Qingdao, 266590, China.

<sup>b</sup> College of Chemical and Biological Engineering, Shandong University of Science and Technology, Qingdao, 266590, China.

<sup>c</sup> Hubei Key Laboratory of Novel Reactor and Green Chemical Technology, School of Chemical Engineering & Pharmacy, Wuhan Institute of Technology, Wuhan, 430073, China.

<sup>d</sup> Department of Mechanical Engineering, University of South Carolina, Columbia, SC, 29208, United States.

\* Corresponding authors: chenfa@cec.sc.edu; qiupeng@sdust.edu.cn

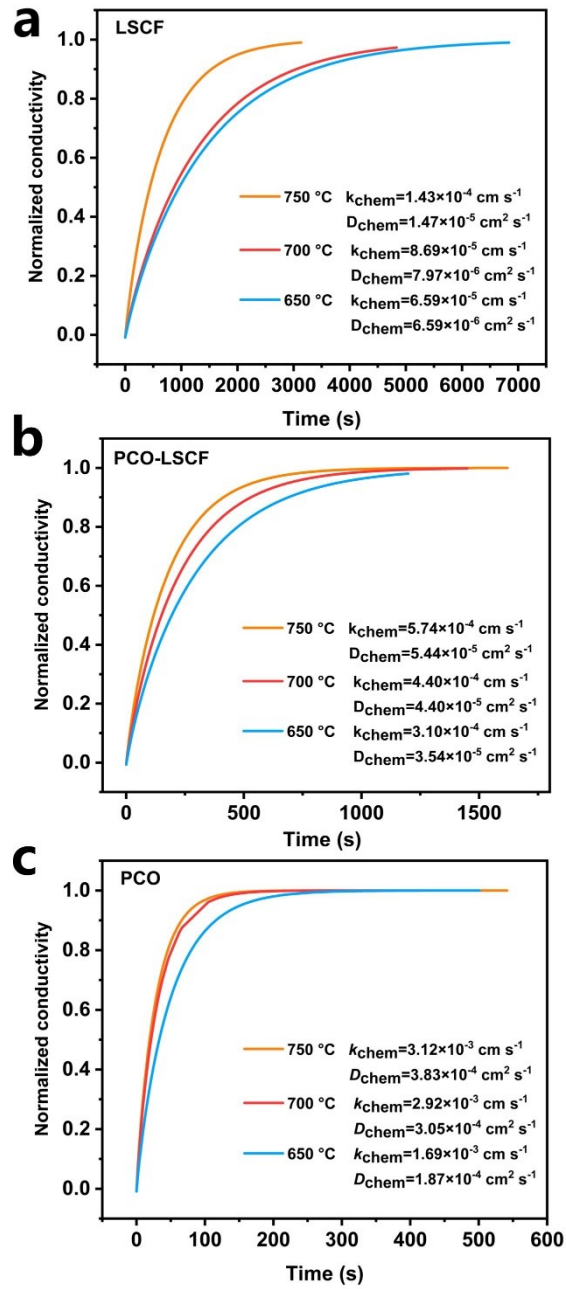

**Figure S1.** ECR responses of the LSCF and PCO-LSCF bars measured at 750-650 °C.

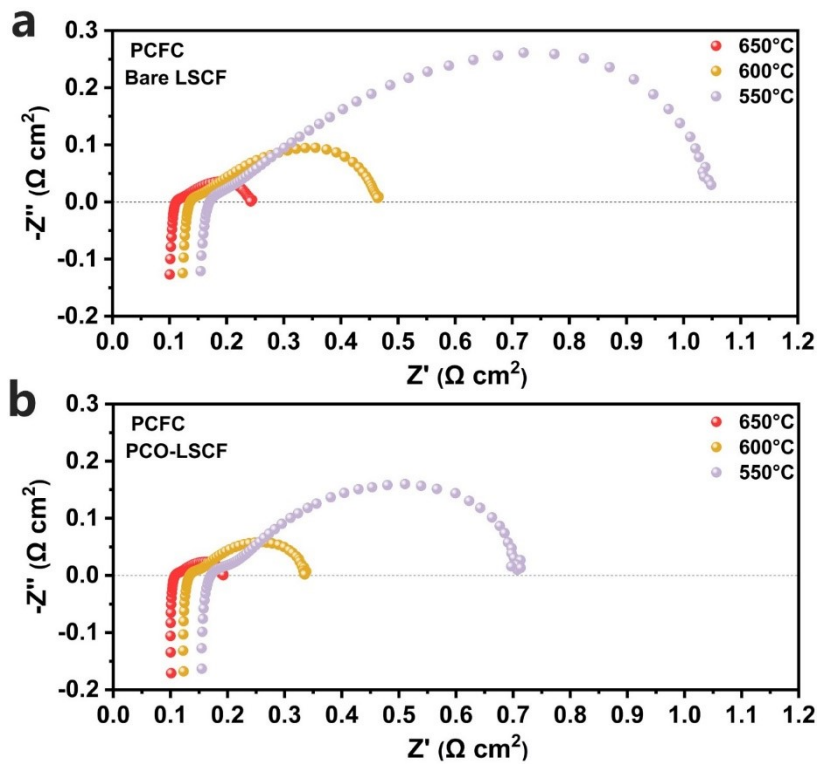

**Figure S2.** EIS of the PCFC single cells with LSCF (a) and PCO-LSCF (b) electrodes at 550-650 °C using  $\text{H}_2$  (3%  $\text{H}_2\text{O}$ ) as the fuel and humidified air (3%  $\text{H}_2\text{O}$ ) as the oxidant under OCV.

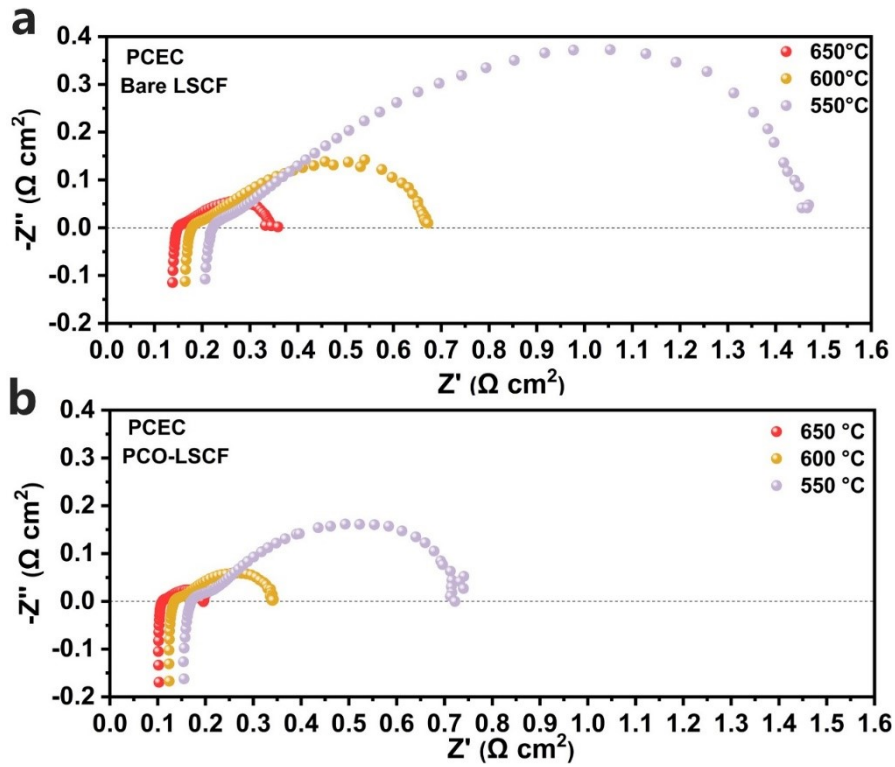

**Figure S3.** EIS of the PCEC single cells with LSCF (a) and PCO-LSCF (b) electrodes at 550-650 °C using  $\text{H}_2$  (3%  $\text{H}_2\text{O}$ ) as the fuel and humidified air (30%  $\text{H}_2\text{O}$ ) as the steam source under OCV.

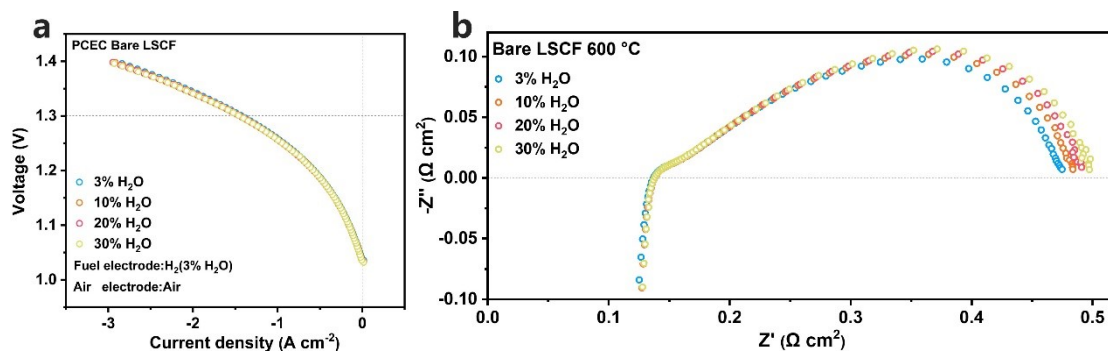

**Figure S4.** (a) I-V curves measured in PCEC mode at 600 °C with various H<sub>2</sub>O concentrations (3-30%) in the air electrode; (b) EIS recorded in PCEC mode at 600 °C with various H<sub>2</sub>O concentrations (3-30%) in the air electrode.

**Note for Figure S4:** The change of H<sub>2</sub>O partial pressure has little effect on the electrochemical performance of single cells, which is consistent with the results reported by Duan *et al.*<sup>1</sup> and He *et al.*<sup>2</sup> Additionally, the results of Zhou *et al.*<sup>3</sup> for the change of  $R_p$  value under different steam concentrations were consistent with this work.

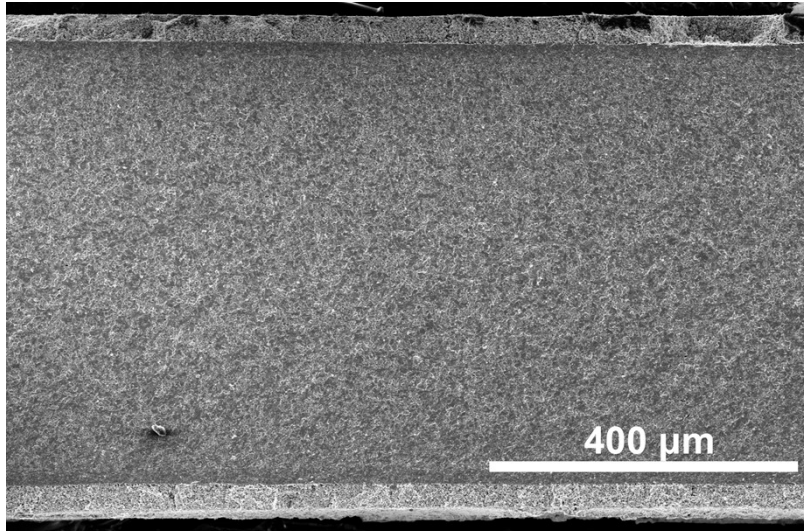

**Figure S5.** SEM image of symmetric cell supported by BZCYYb electrolyte.

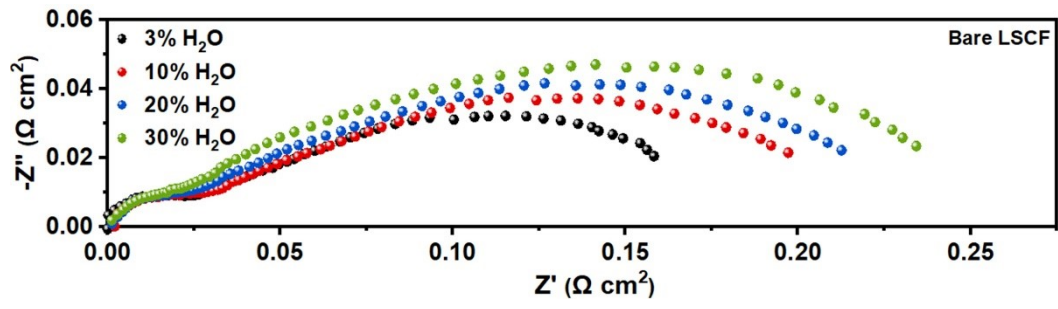

**Figure S6.** EIS of LSCF symmetric cell in the air containing various  $\text{H}_2\text{O}$  concentrations (3-30%) at 650 °C.

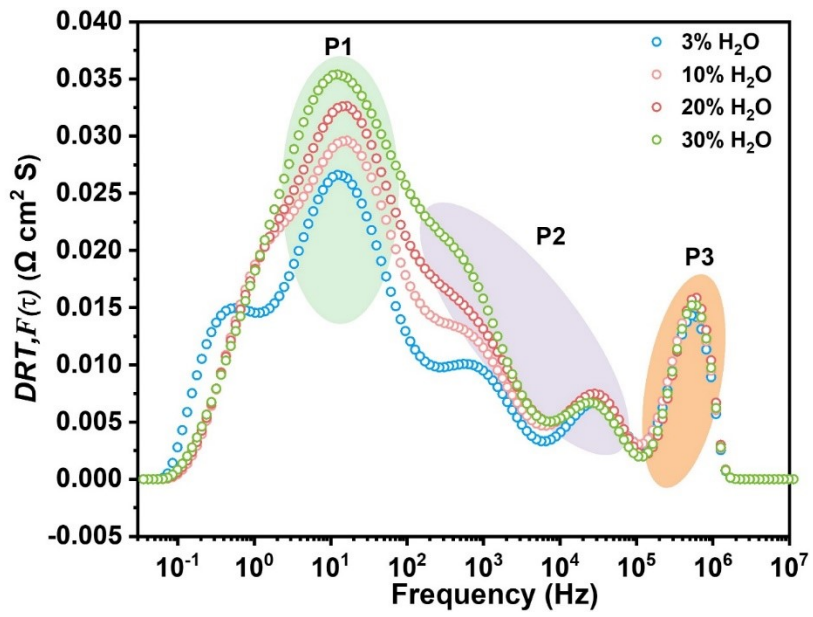

**Figure S7.** DRT analysis of LSCF air electrode based on the EIS at 650 °C under various H<sub>2</sub>O concentrations (3-30%).



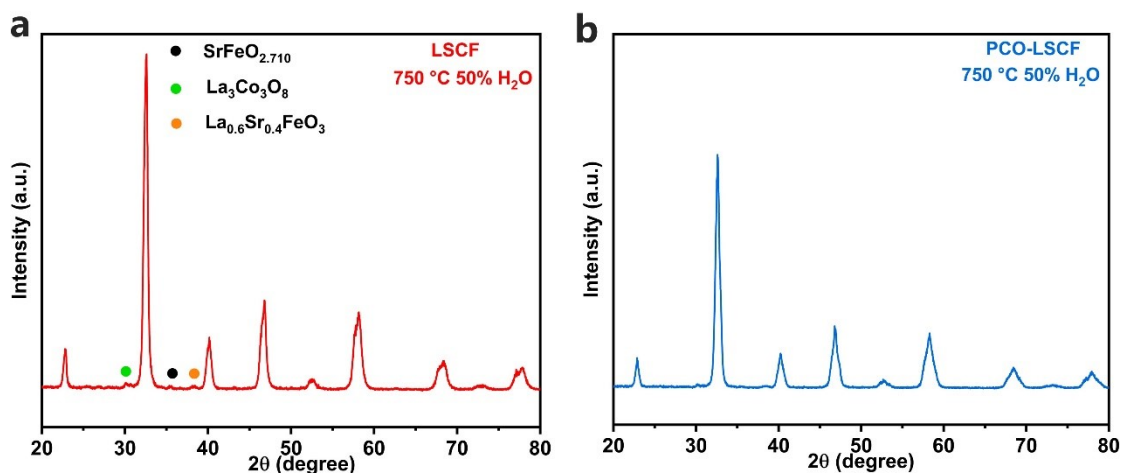

**Figure S8.** XRD patterns of the LSCF (a) and PCO-LSCF (b) powder after being exposed to humidified air (50%  $\text{H}_2\text{O}$ ) at 750 °C for 72 h.

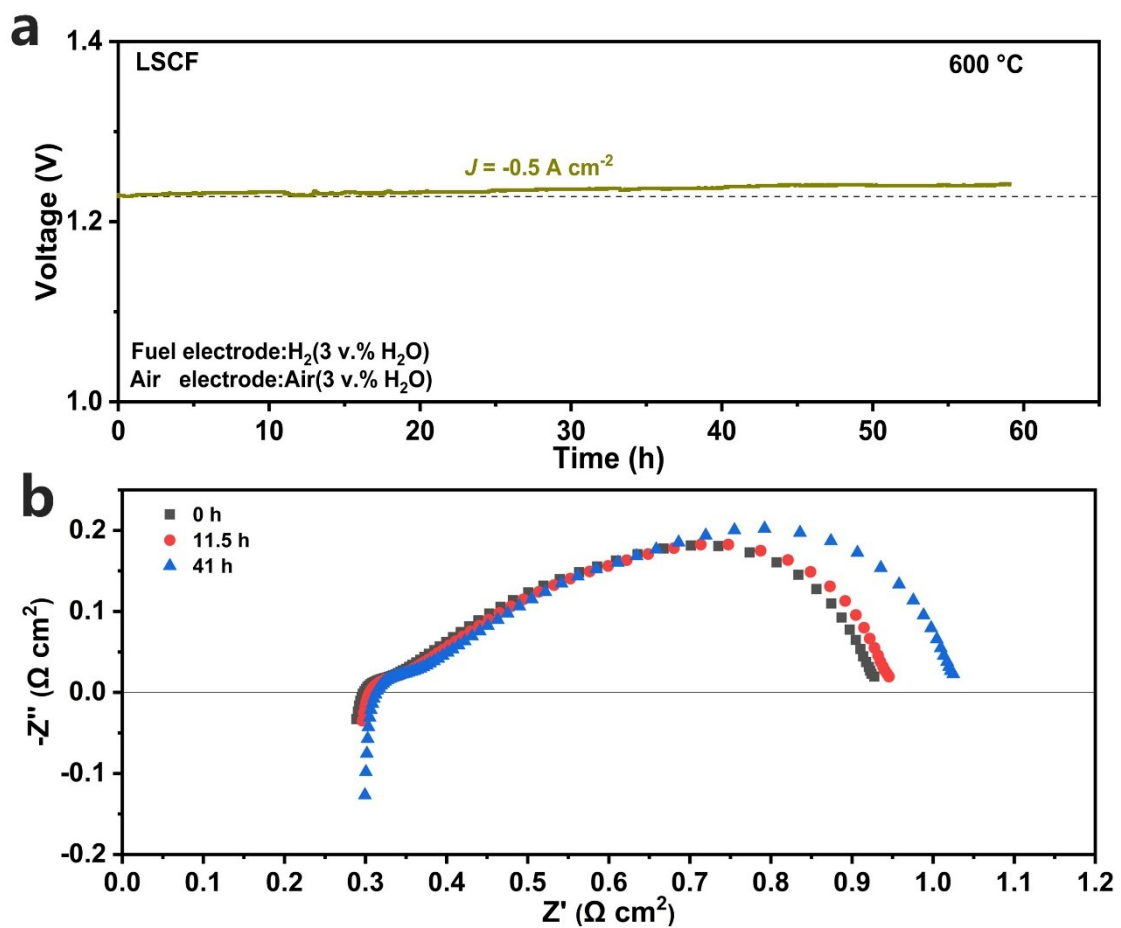

**Figure S9.** (a) Durability test of a PCEC single cell with a LSCF electrode at 600 °C (3%  $\text{H}_2\text{O}$ ,  $J = -0.5 \text{ A cm}^{-2}$ ); (b) EIS recorded at different times during the durability test.

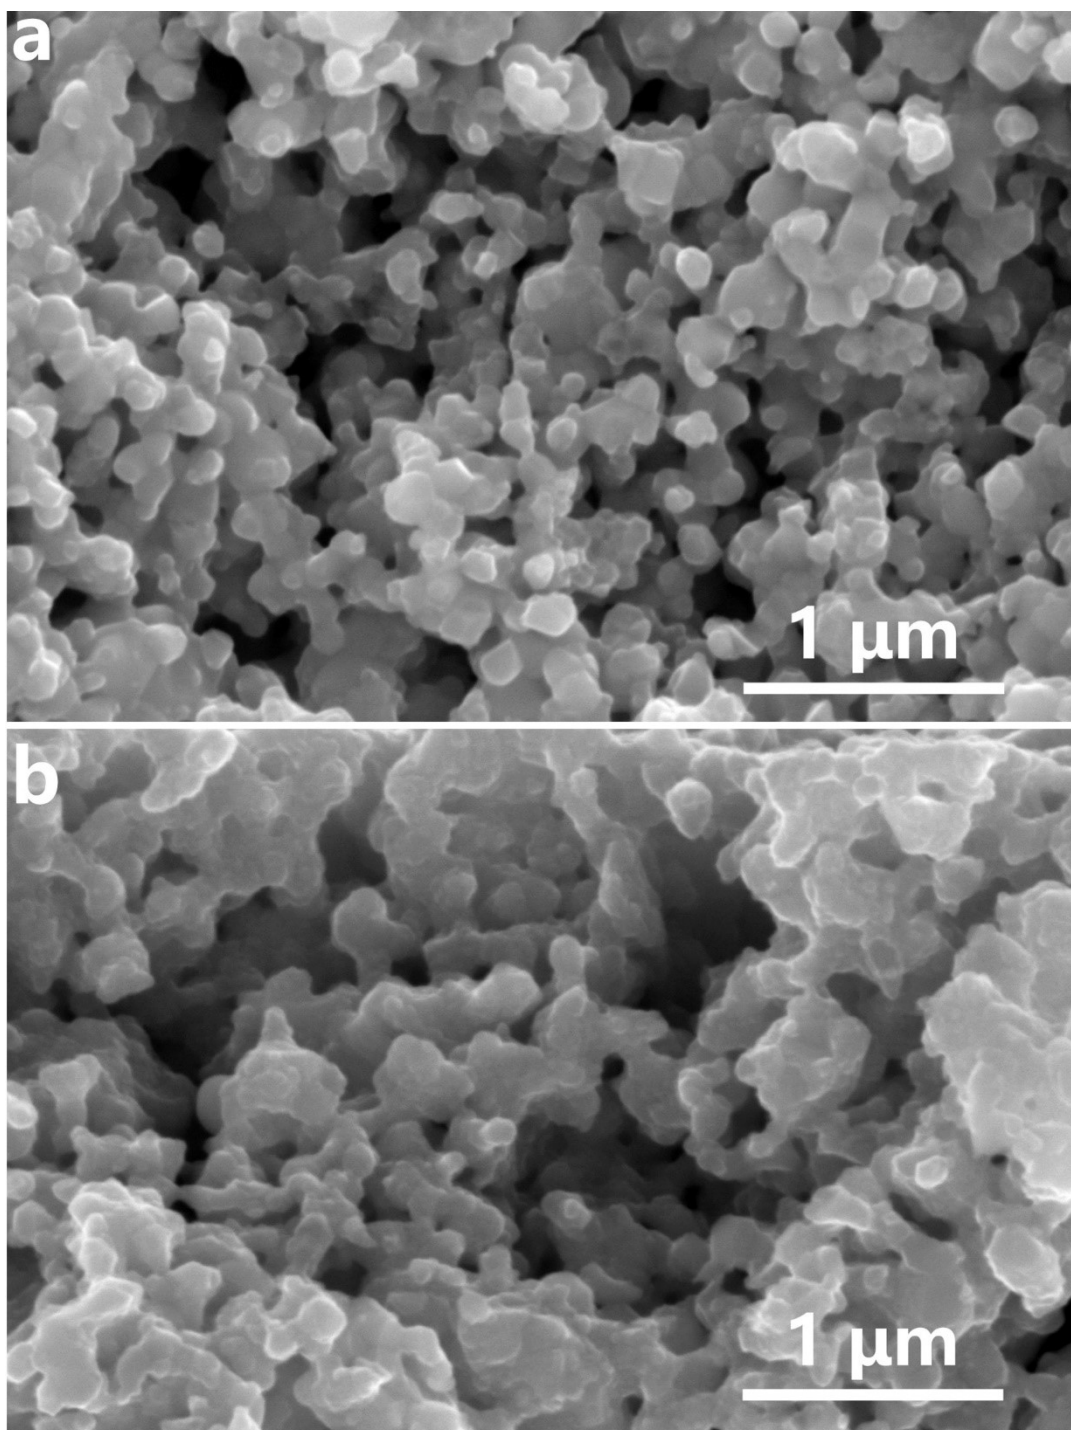

**Figure S10.** SEM images of LSCF air electrode before (a) and after (b) the 60-hour's durability test under the conditions of 600 °C and 3% H<sub>2</sub>O.

**Table S1.** Comparison of  $k_{\text{chem}}$  and  $D_{\text{chem}}$  values between PCO-LSCF and other air electrode materials.

| Materials                                                                                                    | $D_{\text{chem}}$ ( $\text{cm}^2 \text{s}^{-1}$ ) | $k_{\text{chem}}$ ( $\text{cm s}^{-1}$ ) | T ( $^{\circ}\text{C}$ ) | Ref.      |
|--------------------------------------------------------------------------------------------------------------|---------------------------------------------------|------------------------------------------|--------------------------|-----------|
| PrBaCo <sub>2</sub> O <sub>5+<math>\delta</math></sub>                                                       | -                                                 | $3.90 \times 10^{-4}$                    | 750                      | 4         |
| Bi <sub>0.5</sub> Sr <sub>0.5</sub> Fe <sub>0.95</sub> Nd <sub>0.05</sub> O <sub>3-<math>\delta</math></sub> | $0.46 \times 10^{-5}$                             | $1.48 \times 10^{-5}$                    | 700                      | 5         |
| SrFe <sub>0.9</sub> Nb <sub>0.1</sub> O <sub>3-<math>\delta</math></sub>                                     | -                                                 | $2.20 \times 10^{-4}$                    | 700                      | 6         |
| Pr <sub>1.2</sub> Sr <sub>0.8</sub> NiO <sub>4+<math>\delta</math></sub>                                     | -                                                 | $4.40 \times 10^{-4}$                    | 750                      | 7         |
| Sr <sub>2</sub> Fe <sub>1.5</sub> Mo <sub>0.5-x</sub> In <sub>x</sub> O <sub>6-<math>\delta</math></sub>     | $4.20 \times 10^{-5}$                             | $4.98 \times 10^{-4}$                    | 800                      | 8         |
| Ba <sub>0.5</sub> Sr <sub>0.5</sub> FeO <sub>3-<math>\delta</math></sub>                                     | -                                                 | $2.0 \times 10^{-4}$                     | 700                      | 9         |
| PCO-LSCF                                                                                                     | $4.40 \times 10^{-5}$                             | $4.40 \times 10^{-4}$                    | 700                      | This work |
|                                                                                                              | $5.44 \times 10^{-5}$                             | $5.74 \times 10^{-4}$                    | 750                      | This work |

**Table S2.** Current density of single cells with LSCF air electrode at 550-650 °C and 1.1-1.3 V.

| T (°C) | Current Density<br>@1.3 V (A cm <sup>-2</sup> ) | Current Density<br>@1.2 V (A cm <sup>-2</sup> ) | Current Density<br>@1.1 V (A cm <sup>-2</sup> ) |
|--------|-------------------------------------------------|-------------------------------------------------|-------------------------------------------------|
| 650    | 1.85                                            | 0.924                                           | 0.331                                           |
| 600    | 1.14                                            | 0.444                                           | 0.123                                           |
| 550    | 0.550                                           | 0.185                                           | 0.041                                           |

**Table S3.** Current density of single cells with PCO-LSCF air electrode at 550-650 °C and 1.1-1.3 V.

| T (°C) | Current Density<br>@1.3 V (A cm <sup>-2</sup> ) | Current Density<br>@1.2 V (A cm <sup>-2</sup> ) | Current Density<br>@1.1 V (A cm <sup>-2</sup> ) |
|--------|-------------------------------------------------|-------------------------------------------------|-------------------------------------------------|
| 650    | 2.04                                            | 0.998                                           | 0.360                                           |
| 600    | 1.22                                            | 0.483                                           | 0.139                                           |
| 550    | 0.585                                           | 0.221                                           | 0.049                                           |

## References

1. C. Duan, R. Kee, H. Zhu, N. Sullivan, L. Zhu, L. Bian, D. Jennings and R. O'Hayre, *Nat. Energy*, 2019, **4**, 230-240.
2. F. He, S. Liu, T. Wu, M. Yang, W. Li, G. Yang, F. Zhu, H. Zhang, K. Pei and Y. Chen, *Adv. Funct. Mater.*, 2022, **32**, 2206756.
3. Y. Zhou, W. Zhang, N. Kane, Z. Luo, K. Pei, K. Sasaki, Y. Choi, Y. Chen, D. Ding and M. Liu, *Adv. Funct. Mater.*, 2021, **31**, 2105386.
4. Y. Liu, Z. Pan, X. Zhao, S. Zhong, X. Chen and C. Wang, *J. Alloys Compd.*, 2021, **886**, 161155.
5. J. Bai, D. Zhou, X. Zhu, N. Wang, Q. Liang, R. Chen, H. Lu, J. Li and W. Yan, *Ceram. Int.*, 2023, **49**, 28682-28692.
6. C. Geng, J. Yuan, T. Hong, C. Xu and J. Cheng, *J. Eur. Ceram. Soc.*, 2022, **42**, 6557-6565.
7. Y. Liu, Z. Pan, X. Chen, C. Wang and H. Li, *J. Alloys Compd.*, 2023, **931**, 167557.
8. Y. Ma, L. Zhang, K. Zhu, B. Zhang, R. Peng, C. Xia and L. Huang, *Nano Res.*, 2024, **17**, 407-415.
9. Y. Xiao, D. Bao, Z. Wang, Y. Wang and T. He, *Int. J. Hydrogen Energy*, 2024, **57**, 880-888.
